# Supplementary material for: Non-communicable respiratory disease and air pollution exposure in Malawi: a prospective cohort study
Source: PubMed Central journal article supplement (PMC7063402; doi:10.1136/thoraxjnl-2019-213941), 2020-02-20
Supplement: thoraxjnl-2019-213941supp001.pdf [file thoraxjnl-2019-213941supp001.pdf]

## Online supplementary materials

**Table S1.** Availability of data (questionnaire, exposure monitoring and spirometry) for 1481 participants at baseline, first and second follow-up.

|                            | Data available |               |                |                               | Data not available |               |                |
|----------------------------|----------------|---------------|----------------|-------------------------------|--------------------|---------------|----------------|
|                            | n              | Mean age (SD) | Sex (% female) | Percent missing from baseline | n                  | Mean age (SD) | Sex (% female) |
| <b>Questionnaire</b>       |                |               |                |                               |                    |               |                |
| Baseline                   | 1481           | 43.8 (17.8)   | 57.0           | -                             | -                  | -             | -              |
| Follow-up 1                | 1090           | 43.6 (17.5)   | 60.6           | 26.4                          | 391                | 44.5 (18.5)   | 46.8           |
| Follow-up 2                | 989            | 44.0 (17.6)   | 62.9           | 33.2                          | 492                | 43.5 (18.2)   | 45.1           |
| <b>Exposure monitoring</b> |                |               |                |                               |                    |               |                |
| Baseline                   | 1029           | 44.0 (17.9)   | 57.1           | 30.5                          | 452                | 43.4 (17.4)   | 56.6           |
| Follow-up 1                | 830            | 44.0 (17.4)   | 61.8           | 44.0                          | 651                | 43.7 (18.3)   | 50.8           |
| Follow-up 2                | 811            | 44.4 (17.2)   | 62.3           | 45.2                          | 670                | 43.2 (18.4)   | 50.6           |
| Any measurement            | 1330           | 44.0 (17.7)   | 58.6           | 10.2                          | 151                | 42.5 (18.1)   | 42.4           |
| Multiple measurements      | 929            | 44.2 (17.5)   | 61.0           | 37.3                          | 552                | 43.3 (18.1)   | 50.2           |
| <b>Spirometry</b>          |                |               |                |                               |                    |               |                |
| Baseline                   | 886            | 40.9 (15.3)   | 51.1           | 40.2                          | 595                | 48.2 (20.2)   | 65.7           |
| Follow-up 1                | 594            | 39.0 (14.1)   | 51.5           | 59.9                          | 887                | 47.1 (19.2)   | 60.7           |
| Follow-up 2                | 537            | 37.1 (13.8)   | 55.5           | 63.7                          | 944                | 47.7 (18.6)   | 57.8           |
| Any measurement            | 1086           | 40.2 (15.3)   | 53.3           | 26.7                          | 413                | 53.2 (20.1)   | 66.6           |
| Multiple measurements      | 654            | 38.4 (14.0)   | 52.0           | 55.8                          | 827                | 48.1 (19.2)   | 60.9           |

**Table S2.** Likelihood ratio comparison of increasingly complex mixed-effects logCO response models

| <i>Fixed effects parameters</i>              | <i>Comparison</i> | <i>LogLikelihood</i> | <i>Likelihood ratio test</i> | <i>df</i> | <i>p-value</i> |
|----------------------------------------------|-------------------|----------------------|------------------------------|-----------|----------------|
| <b>1</b> None                                | -                 | -4371.4              |                              |           |                |
| <b>2</b> Seasonality                         | 1,2               | -4344.8              | 53.2                         | 2         | <0.001†        |
| <b>3</b> Seasonality, sex                    | 2,3               | -4256.2              | 177.2                        | 1         | <0.001†        |
| <b>4</b> Seasonality, sex, age               | 3,4               | -4256.1              | 0.1                          | 1         | 0.768          |
| <b>5</b> Seasonality, sex, smoker            | 4,5               | -4246.6              | 19.1                         | 1         | <0.001†        |
| <b>6</b> Seasonality, sex, smoker, cookstove | 5,6               | -4246.5              | 0.2                          | 1         | 0.698          |

†Significant at 0.05 level and included in final model. Final fixed effects covariates highlighted in grey.

**Table S3.** Likelihood ratio comparison of increasingly complex mixed-effects logPM<sub>2.5</sub> response models

| <i>Fixed effects parameters</i> | <i>Comparison</i> | <i>LogLikelihood</i> | <i>Likelihood ratio test</i> | <i>df</i> | <i>p-value</i> |
|---------------------------------|-------------------|----------------------|------------------------------|-----------|----------------|
| <b>1</b> None                   | -                 | -6923.7              |                              |           |                |
| <b>2</b> Seasonality            | 1,2               | -6923.2              | 1.1                          | 2         | 0.574          |
| <b>3</b> Sex                    | 1,3               | -6915.4              | 16.7                         | 1         | <0.001†        |
| <b>4</b> Sex, age               | 3,4               | -6914.7              | 1.3                          | 1         | 0.256          |
| <b>5</b> Sex, smoker            | 3,5               | -6913.6              | 3.4                          | 1         | 0.064          |
| <b>6</b> Sex, cookstove         | 3,6               | -6912.2              | 6.2                          | 1         | 0.013†         |

†Significant at 0.05 level and included in final model. Final fixed effects covariates highlighted in grey.

**Table S4.** Comparison of increasingly complex mixed-effects FEV<sub>1</sub> response models

|           | <i>Fixed effects parameters</i>                  | <i>Comparison</i> | <i>LogLikelihood</i> | <i>Likelihood ratio test</i> | <i>df</i> | <i>p-value</i> |
|-----------|--------------------------------------------------|-------------------|----------------------|------------------------------|-----------|----------------|
| <b>0</b>  | None                                             | -                 | -13723               | -                            | -         | -              |
| <b>1</b>  | Time                                             | 0,1               | -13704               | 38.7                         | 1         | <0.001†        |
| <b>2</b>  | Time, age                                        | 1,2               | -13602               | 203.0                        | 1         | <0.001†        |
| <b>3</b>  | Time, age, sex                                   | 2,3               | -13379               | 446.0                        | 1         | <0.001†        |
| <b>4</b>  | Time, age, sex, height                           | 3,4               | -13312               | 134.7                        | 1         | <0.001†        |
| <b>5</b>  | Time, age, sex, height, smoker                   | 4,5               | -13310               | 3.2                          | 1         | 0.072          |
| <b>6</b>  | Time, age, sex, height, TB                       | 4,6               | -13299               | 25.5                         | 1         | <0.001†        |
| <b>7</b>  | Time, age, sex, height, TB, BMI                  | 6,7               | -13285               | 28.9                         | 1         | <0.001†        |
| <b>8</b>  | Time, age, sex, height, TB, BMI, years at school | 7,8               | -13284               | 1.3                          | 1         | 0.248          |
| <b>9</b>  | Time, age, sex, height, TB, BMI, cookstove       | 7,9               | -13285               | 0.14                         | 1         | 0.706          |
| <b>10</b> | Time, age, sex, height, TB, BMI, CO              | 7,10              | -13285               | 0.08                         | 1         | 0.777          |
| <b>11</b> | Time, age, sex, height, TB, BMI, PM              | 7,11              | -13284               | 2.1                          | 1         | 0.146          |
| <b>12</b> | Time, age, sex, height, TB, BMI, time*age        | 7,12              | -13284               | 0.87                         | 1         | 0.352          |
| <b>13</b> | Time, age, sex, height, TB, BMI, time*sex        | 7,13              | -13285               | 0.12                         | 1         | 0.726          |
| <b>14</b> | Time, age, sex, height, TB, BMI, time*TB         | 7,14              | -13285               | 0                            | 1         | 0.998          |
| <b>15</b> | Time, age, sex, height, TB, BMI, time*PM         | 7,15              | -13283               | 2.94                         | 2         | 0.230          |
| <b>16</b> | Time, age, sex, height, TB, BMI, time*CO         | 7,16              | -13284               | 0.34                         | 2         | 0.842          |

†Significant at 0.05 level and included in final model. Final fixed effects covariates highlighted in grey.

BMI = body mass index, CO = carbon monoxide, PM = fine particulate matter, TB = tuberculosis

**Table S5.** Comparison of increasingly complex mixed-effects FVC response models

|           | <i>Fixed effects parameters</i>                  | <i>Comparison</i> | <i>LogLikelihood</i> | <i>Likelihood ratio test</i> | <i>df</i> | <i>p-value</i> |
|-----------|--------------------------------------------------|-------------------|----------------------|------------------------------|-----------|----------------|
| <b>0</b>  | None                                             | -                 | -13912               | -                            | -         | -              |
| <b>1</b>  | Time                                             | 0,1               | -13885               | 54.08                        | 1         | <0.001†        |
| <b>2</b>  | Time, age                                        | 1,2               | -13862               | 45.96                        | 1         | <0.001†        |
| <b>3</b>  | Time, age, sex                                   | 2,3               | -13560               | 604.00                       | 1         | <0.001†        |
| <b>4</b>  | Time, age, sex, height                           | 3,4               | -13454               | 212.11                       | 1         | <0.001†        |
| <b>5</b>  | Time, age, sex, height, smoker                   | 4,5               | -13454               | 0.08                         | 1         | 0.775          |
| <b>6</b>  | Time, age, sex, height, TB                       | 4,6               | -13446               | 15.04                        | 1         | <0.001†        |
| <b>7</b>  | Time, age, sex, height, TB, BMI                  | 6,7               | -13435               | 22.69                        | 1         | <0.001†        |
| <b>8</b>  | Time, age, sex, height, TB, BMI, years at school | 7,8               | -13435               | 0.001                        | 1         | 0.973          |
| <b>9</b>  | Time, age, sex, height, TB, BMI, cookstove       | 7,9               | -13435               | 0.12                         | 1         | 0.732          |
| <b>10</b> | Time, age, sex, height, TB, BMI, CO              | 7,10              | -13434               | 1.89                         | 1         | 0.170          |
| <b>11</b> | Time, age, sex, height, TB, BMI, PM              | 7,11              | -13434               | 1.33                         | 1         | 0.249          |
| <b>12</b> | Time, age, sex, height, TB, BMI, time*age        | 7,12              | -13433               | 3.34                         | 1         | 0.068          |
| <b>13</b> | Time, age, sex, height, TB, BMI, time*sex        | 7,13              | -13435               | 0.08                         | 1         | 0.78           |
| <b>14</b> | Time, age, sex, height, TB, BMI, time*TB         | 7,14              | -13434               | 0.79                         | 1         | 0.37           |
| <b>15</b> | Time, age, sex, height, TB, BMI, time*PM         | 7,15              | -13434               | 2.70                         | 2         | 0.259          |
| <b>16</b> | Time, age, sex, height, TB, BMI, time*CO         | 7,16              | -13434               | 1.96                         | 2         | 0.376          |

†Significant at 0.05 level and included in final model. Final fixed effects covariates highlighted in grey.

BMI = body mass index, CO = carbon monoxide, PM = fine particulate matter, TB = tuberculosis

**Text S1.****Regression equations for mixed-effects exposure models****CO model**

$$\log Y_{ijt} = \alpha + b_{ijt}\beta_1 + c_{ijt}\beta_2 + d_{ijt}\beta_3 + e_{ijt}\beta_4 + U_i + V_{ij} + Z_{ijt}$$

where:

$Y_{ijt}$  = exposure measurement for participant  $i$ , during 48-hr monitoring period  $j$ , on day  $t$

$\beta_1, \beta_2, \beta_3, \beta_4$  = fixed effects parameter estimates

$b$  = sex (female=1, male=0)

$c$  = current smoker (yes=1, no=0)

$d = \cos\left(\frac{2\pi}{365} * \text{day of year}\right)$

$e = \sin\left(\frac{2\pi}{365} * \text{day of year}\right)$

$U_i \sim N(0, \sigma_u^2)$ , random effect for the  $i$ th participant

$V_{ij} \sim N(0, \sigma_v^2)$ , random effect for  $j$ th 48-hour monitoring period in the  $i$ th participant

$Z_{ijt} \sim N(0, \sigma_x^2)$ , error term associated with the  $t$ th measurement in the  $j$ th 48-monitoring period for the  $i$ th participant.

**PM<sub>2.5</sub> model**

$$\log Y_{ijt} = \alpha + b_{ijt}\beta_1 + c_{ijt}\beta_2 + U_i + V_{ij} + Z_{ijt}$$

where:

$Y_{ijt}$  = exposure measurement for participant  $i$ , during 48-hr monitoring period  $j$ , on day  $t$

$\beta_1, \beta_2$  = fixed effects parameter estimates

$b$  = sex (female=1, male=0)

$c$  = access to cookstove (yes=1, no=0)

$U_i \sim N(0, \sigma_u^2)$ , random effect for the  $i$ th participant

$V_{ij} \sim N(0, \sigma_v^2)$ , random effect for the  $j$ th 48-hour monitoring period in the  $i$ th participant

$Z_{ijt} \sim N(0, \sigma_x^2)$ , error term associated with the  $t$ th measurement in the  $j$ th 48-monitoring period for the  $i$ th participant.

**Regression equations for mixed-effects lung function (FEV<sub>1</sub> and FVC) models**

$$Y_{it} = \alpha + b_{it}\beta_1 + c_{it}\beta_2 + d_{it}\beta_3 + e_{it}\beta_4 + f_{it}\beta_5 + g_{it}\beta_6 + U_i + Z_{it}$$

where:

$Y_{ijt}$  = lung function measurement for participant  $i$ , on day  $t$

$\beta_1, \beta_2, \beta_3, \beta_4, \beta_5, \beta_6$  = fixed effects parameter estimates

$b$  = time in years

$c$  = age in years

$d$  = sex (female=1, male=0)

$e$  = height in cm

$f$  = previous tuberculosis (yes=1, no=0)

$g$  = Body Mass Index in kg/m<sup>2</sup>

$U_i \sim N(0, \sigma_u^2)$ , random effect for the  $i$ th participant

$Z_{it} \sim N(0, \sigma_x^2)$ , error term associated with the  $t$ th measurement for the  $i$ th participant.
